# Supplementary material
Source: ML conference proceedings conference paper supplement (https://openreview.net/forum?id=HFvPfNDTShj)
Supplement: supplementary_material [file attachment]

## A Deferred proofs

### A.1 Proof of Corollary 1

Consider two potential “bad” events:  $B_1$ , where  $\|\hat{\mu}_n - \mu\|_\infty > 1/2$ , and  $B_2$ , where  $\|\mu - \hat{\mu}_n\|_1 > \frac{2\|\hat{\mu}_n\|_1^{1/2}}{\sqrt{n}} + 6\sqrt{\frac{\ln(4/\delta)}{2n}}$ . Our assumption on the sample size  $n$ , together with the Dvoretzky-Kiefer-Wolfowitz inequality [Massart, 1990], implies that  $\mathbb{P}(B_1) \leq \delta/2$  and (1) implies that  $\mathbb{P}(B_2) \leq \delta/2$ . Thus, with probability at least  $1 - \delta$ , neither of  $B_1$  or  $B_2$  occurs, and we may invoke Theorem 1, from which the claim immediately follows.  $\square$

### A.2 Proof of Theorem 2

The following non-trivial fact [Lieb and Loss, 2001, Theorem 3.5 and Eq. (5) on p. 83] will be useful<sup>6</sup>:

$$\|\mu^\downarrow - \nu^\downarrow\|_p \leq \|\mu - \nu\|_p, \quad p \in [1, \infty], \quad \mu, \nu \in \Delta_{\mathbb{N}}. \quad (11)$$

A result of Scheffé [1947] (more accurately credited to Riesz, 1928 [Kusolitsch, 2010]) implies that a sequence  $\{\xi_{n \in \mathbb{N}}\} \subset \ell_1(\mathbb{N})$  converging pointwise to some  $\xi \in \ell_1(\mathbb{N})$  also converges in  $\ell_1$  iff  $\|\xi_n\|_1 \rightarrow \|\xi\|_1$ . This immediately implies

**Lemma 3.** *If  $\{\mu_{n \in \mathbb{N}}\} \subset \Delta_{\mathbb{N}}$  converges pointwise to some  $\mu \in \Delta_{\mathbb{N}}$ , then it also converges in  $\ell_1$ .*

Berend et al. [2017, Lemma 1] showed that  $\Delta_{\mathbb{N}}^{\downarrow(1)}[h]$  is compact under  $\ell_1$ . We begin by extending this result to general  $\alpha, p$ .

**Lemma 4.** *For all  $\alpha \geq 1$ ,  $p \in [1, \infty]$ , and  $h > 0$ , the set  $\Delta_{\mathbb{N}}^{\downarrow(\alpha)}[h]$  is compact under  $\ell_p$ .*

**Remark.** This is quite false if either the non-increasing or the bounded-entropy condition is omitted. For a counterexample to the former, consider the sequence  $\mu_n \in \Delta_{\mathbb{N}}$  defined by  $\mu_n(i) = \mathbf{1}[i = n]$ . For a counterexample to the latter, consider the sequence  $\mu_n \in \Delta_{\mathbb{N}}$ , where  $\mu_n$  is uniform on  $[n]$ .

*Proof.* We closely follow the proof strategy of Berend et al. [2017, Lemma 1]. In a metric space, compactness and sequential compactness are equivalent. Let  $\mu_{n \in \mathbb{N}}$  be a sequence in  $\Delta_{\mathbb{N}}^{\downarrow(\alpha)}[h]$ . Since  $[0, 1]$  is compact, every  $\{\mu_n(i) : n \in \mathbb{N}\}$  has a convergent subsequence, and hence  $\mu_{n \in \mathbb{N}}$  has a pointwise convergent subsequence. There is thus no loss of generality in assuming that  $\mu_n \rightarrow \mu$  pointwise. Obviously,  $\mu$  is non-negative and non-increasing. It remains to show that

$$(a) \sum_{i \in \mathbb{N}} \mu(i) = 1,$$

$$(b) H^{(\alpha)}(\mu) \leq h,$$

$$(c) \|\mu_n - \mu\|_p \rightarrow 0.$$

To show (a), assume, for a contradiction, that  $\sum_{i \in \mathbb{N}} \mu(i) > 1$ . Then there must be an  $i_0 \in \mathbb{N}$  such that  $\sum_{i=1}^{i_0} \mu(i) > 1$ . But the latter must then hold for all  $\mu_n$  with  $n$  sufficiently large, which contradicts  $\mu_n \in \Delta_{\mathbb{N}}$ . Now assume  $\varepsilon := 1 - \sum_{i \in \mathbb{N}} \mu(i) > 0$ . For any  $i_0 \in \mathbb{N}$ , we have  $\sum_{i=1}^{i_0} \mu_n(i) < 1 - \varepsilon/2$  for all sufficiently large  $n$ . Now every  $\nu \in \Delta_{\mathbb{N}}^{\downarrow}$  satisfies  $\nu(i) \leq \frac{1}{i}(\nu(1) + \nu(2) + \dots + \nu(i)) \leq \frac{1}{i}$ . Hence,

$$\sum_{i=i_0+1}^{\infty} \mu_n(i) |\log \mu_n(i)|^\alpha \geq \sum_{i=i_0+1}^{\infty} \mu_n(i) (\log i_0)^\alpha > \frac{\varepsilon}{2} (\log i_0)^\alpha.$$

<sup>6</sup>The result is stated for functions in  $f \in L_2(\mathbb{R}^n)$  and their symmetric-decreasing rearrangements  $f^*$ , but the specialization to discrete distributions is straightforward. We convert  $\mu$  to a function  $f : \mathbb{R}_+ \rightarrow \mathbb{R}_+$  via  $f(x) = \mu(\lceil x \rceil)$  and  $\nu$  to  $g(x)$  analogously. A direct calculation then shows that  $\|\mu - \nu\|_p = \|f - g\|_p$  and  $\|\mu^\downarrow - \nu^\downarrow\|_p = \|f^* - g^*\|_p$ , to which the result from Lieb and Loss [2001] applies to yield (11).

398 Choosing  $i_0$  sufficiently large makes the latter expression exceed  $h$ , violating the assumption  $\mu_n \in$   
 399  $\Delta_{\mathbb{N}}^{\downarrow(\alpha)}[h]$ . Thus (a) holds.

400 To show (b), assume for a contradiction that  $H^{(\alpha)}(\mu) > h$  — and, in particular,  
 401  $\sum_{i=1}^{i_0} \mu(i) |\log \mu(i)|^\alpha > h$  for some  $i_0 \in \mathbb{N}$ . But the latter must hold for all  $\mu_n$  with  $n$  suffi-  
 402 ciently large, a contradiction.

403 Finally, to show (c), we invoke Lemma 3: if  $\{\mu_{n \in \mathbb{N}}\} \subset \Delta_{\mathbb{N}}$  converges pointwise to some  $\mu \in \Delta_{\mathbb{N}}$ ,  
 404 then it also converges in  $\ell_1$ . Since  $\ell_1$  dominates every  $\ell_p$ ,  $p > 1$ , this proves (c).  $\square$

405 Next, we examine the continuity of  $H(\cdot)$  on  $\Delta_{\mathbb{N}}^{\downarrow(\alpha)}[h]$  under  $\ell_p$ .

406 **Lemma 5.** Fix  $h > 0$ ,  $\alpha > 1$ , and  $p \in [1, \infty]$ . If  $\{\mu_{n \in \mathbb{N}}\} \subset \Delta_{\mathbb{N}}^{\downarrow(\alpha)}[h]$  converges in  $\ell_p$ , then its limit  
 407 is some  $\mu \in \Delta_{\mathbb{N}}^{\downarrow(\alpha)}[h]$  and furthermore,  $H(\mu_n) \rightarrow H(\mu)$ . In other words,  $H(\cdot)$  is continuous on  
 408  $\Delta_{\mathbb{N}}^{\downarrow(\alpha)}[h]$  under  $\ell_p$ .

409 **Remark.** We note that  $H(\cdot)$  is not continuous on  $\Delta_{\mathbb{N}}^{\downarrow(1)}[h]$  under  $\ell_p$ ,  $p \in [1, \infty]$ , as evidenced by  
 410 the sequence  $\mu_n = (1 - \varepsilon_n, \varepsilon_n/n, \dots, \varepsilon_n/n, 0, 0, \dots)$ , with support size  $n + 1$ . We can choose  $\varepsilon_n$  so  
 411 that  $H(\mu_n) = h$ , but of course the limiting  $\mu$  has  $H(\mu) = 0$  (see Example 1 in Berend et al. [2017]).

412 *Proof.* It follows from Lemma 4 that the limiting  $\mu$  belongs to  $\Delta_{\mathbb{N}}^{\downarrow(\alpha)}[h]$ . Further, Lemma 3 implies  
 413 that  $\mu_n \rightarrow \mu$  in  $\ell_1$ . Invoking the continuity result in Theorem 1 proves the claim.  $\square$

414 *Proof of Theorem 2.* It follows from Lemma 5 that  $H(\cdot)$  is continuous on  $\Delta_{\mathbb{N}}^{\downarrow(\alpha)}[h]$  under  $\ell_p$ . Since,  
 415 by Lemma 4,  $\Delta_{\mathbb{N}}^{\downarrow(\alpha)}[h]$  is compact under  $\ell_p$ , it follows that  $H(\cdot)$  is uniformly continuous on  $\Delta_{\mathbb{N}}^{\downarrow(\alpha)}[h]$ :  
 416 there is a function  $F$  such that

$$|H(\mu) - H(\nu)| \leq F(\|\mu - \nu\|_p, h, \alpha, p), \quad \mu, \nu \in \Delta_{\mathbb{N}}^{\downarrow(\alpha)}[h]$$

417 and  $\varepsilon_n := \|\mu_n - \nu_n\|_p \rightarrow 0 \implies F(\varepsilon_n, h, \alpha, p) \rightarrow 0$ . Now, for all  $\mu, \nu \in \Delta_{\mathbb{N}}^{\downarrow(\alpha)}[h]$  we have

$$\begin{aligned} |H(\mu) - H(\nu)| &= |H(\mu^\downarrow) - H(\nu^\downarrow)| \\ &\leq F(\|\mu^\downarrow - \nu^\downarrow\|_p, h, \alpha, p). \end{aligned}$$

418 It follows from (11) that  $\|\mu_n - \nu_n\|_p \rightarrow 0 \implies \|\mu^\downarrow - \nu^\downarrow\|_p \rightarrow 0$ , which concludes the proof.  $\square$

## 419 B Auxiliary results

420 **Proposition 2.** For  $K \geq 2$  and  $\alpha \geq 1$ ,

$$\max \{\log K, (\alpha/e)\}^\alpha \leq \max_{\mu \in \Delta_K} H^{(\alpha)}(\mu) \leq \max \{\alpha, \log K\}^\alpha + (\alpha/e)^\alpha.$$

421 We will need the following useful (and likely known) result.

422 **Lemma 6** (folklore). Suppose that  $0 < a < 1$  and  $f : [0, 1] \rightarrow \mathbb{R}$  is strictly concave on  $[0, a]$  and  
 423 strictly convex on  $[a, 1]$ . Define the function  $F : \Delta_K \rightarrow \mathbb{R}$  by

$$F(\mu) = \sum_{i=1}^K f(\mu(i)).$$

424 Then any maximizer  $\mu^*$  of  $F$  is either the uniform distribution or else has exactly 1 “heavy” mass  
 425  $v \in [a, 1]$  and  $K - 1$  identical “light” masses  $(1 - v)/(K - 1)$ .

426 *Proof.* A standard “smoothing” argument [Loh, 2013] shows that if two masses  $u \leq v$  occur in the  
 427 interval  $(a, 1)$ , there is an  $\varepsilon > 0$  such that  $f(u - \varepsilon) + f(v + \varepsilon) > f(u) + f(v)$ . In other words,  
 428 such masses can be pushed apart (keeping their sum fixed) to increase the value of  $F$ , until one of  
 429 them reaches the boundary of  $[a, 1]$ . Furthermore, since  $0 < a < u < v$  and  $u + v \leq 1$ , repeated

iteration of the “pushing apart” operation will hit the left endpoint (i.e.,  $a$ ) rather than the right one (i.e., 1). Having exhausted the “pushing apart” process, we are left with one “heavy” mass  $v \in [a, 1]$  and  $K - 1$  “lighter” ones in  $[0, a]$ . But concavity implies that  $F$  will be maximized by pulling the lighter masses in (as opposed to pushing them apart), which amounts to replacing each of them by the average of the  $K - 1$  values.  $\square$

*Proof of Proposition 2.* Choosing  $\mu$  to be the uniform distribution yields  $H^{(\alpha)}(\mu) = \log^\alpha K$ , and choosing  $\mu$  such that  $v := \mu(1) = e^{-\alpha}$  yields  $H^{(\alpha)}(\mu) \geq v \log(1/v)^\alpha = (\alpha/e)^\alpha$ . Thus, the lower bound is proven and it only remains to prove the upper bound.

Let  $\mu^*$  be a maximizer for given  $\alpha, K$ . Recall the function  $h^{(\alpha)}(z) = z \log^\alpha(1/z)$  and note that it is strictly concave on  $[0, e^{-(\alpha-1)}]$  and strictly convex on  $[e^{-(\alpha-1)}, 1]$ . Then Lemma 6 shows that  $\mu^*$  will either be uniform or else attains at most one value  $v \in [e^{-(\alpha-1)}, 1]$  in the convex interval, with the remaining values equal to  $\frac{1-v}{K-1} \in [0, e^{-(\alpha-1)}]$  in the concave interval. Only the latter case is non-trivial:

$$H^{(\alpha)}(\mu^*) = v \left( \log \frac{1}{v} \right)^\alpha + (1-v) \left( \log \frac{K-1}{1-v} \right)^\alpha$$

for some  $v$  satisfying

$$0 < \frac{1-v}{K-1} \leq e^{-(\alpha-1)} \leq v < 1. \quad (12)$$

Now  $v \left( \log \frac{1}{v} \right)^\alpha$  is maximized over  $[0, 1]$  by  $v = e^{-\alpha}$ , which yields the value  $(\alpha/e)^\alpha$ .

To bound the second term,  $g(v) := (1-v) \left( \log \frac{K-1}{1-v} \right)^\alpha$ , we consider two cases: (i)  $K - 1 < e^\alpha$  and (ii)  $K - 1 \geq e^\alpha$ . In case (i),  $g$  is maximized by  $v^* = 1 - (K - 1)/e^\alpha$  and

$$g(v^*) = (1-v^*) \left( \log \frac{K-1}{1-v^*} \right)^\alpha \leq \left( \log \frac{K-1}{1-v^*} \right)^\alpha = \alpha^\alpha.$$

In case (ii),  $g$  is monotonically decreasing in  $v$ . The constraint  $\frac{1-v}{K-1} \leq v$  from (12) implies  $v \geq 1/K$ , so in this case,

$$g(v) \leq \left( \log \frac{K-1}{1-1/K} \right)^\alpha = \log^\alpha K.$$

This proves the upper bound.  $\square$
